# Supplementary material
Source: Research Square preprint supplement (doi:10.21203/rs.3.rs-9020076/v1)

**Author Agreement Statement**

**Title:**​Parameter Regulation and Projection Enhancement Matrix Splitting Method: Efficient Solution for H₊-Matrix Linear Complementarity Problems

**Authors:**​ Yajun Xie, Yuting Zhang, Jianfeng Li

We, the undersigned authors, hereby declare that:

1. This manuscript is our original work, has not been published previously, and is not under consideration for publication elsewhere.
2. The manuscript has been approved by all authors. All authors have contributed significantly to the research and the preparation of the manuscript.
3. The authors confirm that there are no known conflicts of interest associated with this publication.
4. If accepted for publication, the copyright of the article will be transferred to the publisher.

**Corresponding Author Signature:**


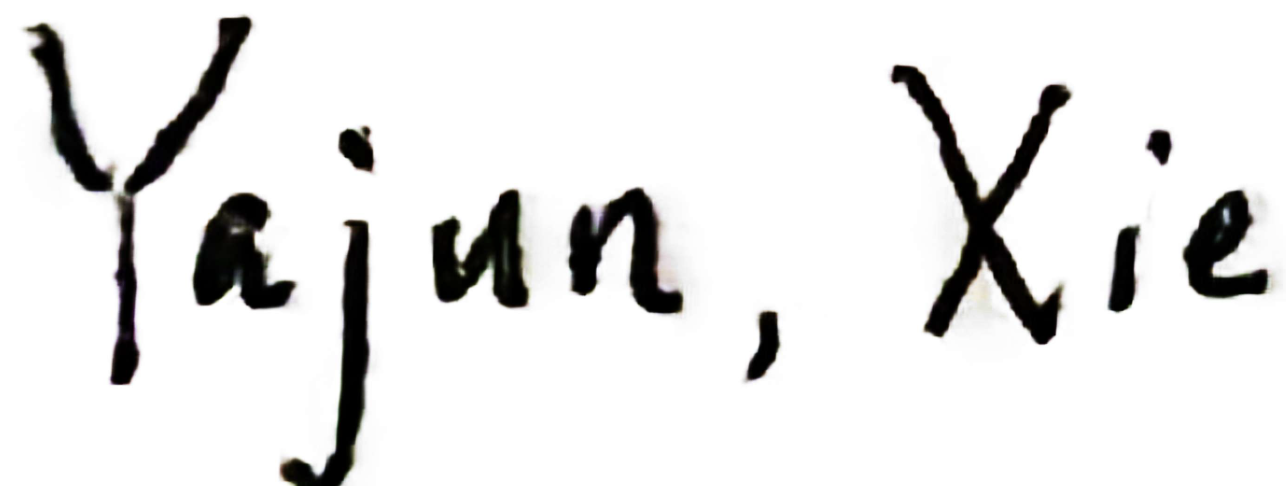

Supplement: Supplementary file 1 [file b26abdaf1ea7a1c3ec12c247.docx]
