# Supplementary material
Source: Research Square preprint supplement (doi:10.21203/rs.3.rs-9020076/v1)
Supplement: Supplementary file 2 [file b72c92567771c8d95493093d.docx]

****Highlights****

- A novel **Modified Matrix Splitting Iteration (MMSI) method**​ is proposed for efficiently solving H₊-matrix Linear Complementarity Problems (LCPs).
- The method **innovatively combines double-diagonal parameter matrices, a relaxation factor, and a projection operator**, enhancing robustness against arbitrary initial points and accelerating convergence.
- **Rigorous theoretical convergence proof**​ is provided, establishing the global convergence of the MMSI algorithm when the coefficient matrix is a positive definite H₊-matrix.
- **Comprehensive numerical experiments validate the algorithm's superiority.**​ Compared to state-of-the-art GAOR and GSOR methods, MMSI demonstrates significant advantages in both iteration counts and computation time, achieving iteration step acceleration ratios over 6 and runtime acceleration ratios over 2 in certain tests.
- The method serves as an **effective generalization of the Generalized AOR (GAOR) and Generalized SOR (GSOR) methods**, delivering superior numerical performance through more flexible parameter settings while maintaining theoretical rigor.
