# Supplementary material
Source: Research Square preprint supplement (doi:10.21203/rs.3.rs-9020076/v1)
Supplement: Supplementary file 3 [file f75e1276b48709321c6a554c.docx]

**Declaration of interest statement**
 
☒ The authors declare that they have no known competing financial interests or personal relationships that could have appeared to influence the work reported in this paper.
 
☐ The authors declare the following financial interests/personal relationships which may be considered as potential competing interests:

 
 
 
